# Supplementary material
Source: PubMed Central journal article supplement (PMC3403109)
Supplement: supp_139.16.3040_DEV077644TableS1.pdf [file supp_139.16.3040_DEV077644TableS1.pdf]

## Table S1. Sequences of oligonucleotides used for molecular cloning and PCR

### Primers used to generate genomic rescue constructs in pCaSpeR4

|                                                                                       |                                                        |
|---------------------------------------------------------------------------------------|--------------------------------------------------------|
| Entire Genomic Region For <i>Sma</i> I (for <i>CG14671</i> + <i>PI4KII</i> construct) | TCC CCC CGG GCC TAA ATA ATT GAA GAG ATA ACC AAA CGA CG |
| Entire Genomic Region Rev <i>Not</i> I (for <i>CG14671</i> + <i>PI4KII</i> construct) | GGG CGG CCG CTA GTC GAT TAC TTT ACT GAA TTC GAG GAC C  |
| PI4KII Genomic Rescue For <i>Sma</i> I (for <i>PI4KII</i> construct)                  | TCC CCC CGG GTT CCA CCT CGT TGA GGA GCA CAC CCA GTG TC |
| PI4KII Genomic Rescue Rev <i>Not</i> I (for <i>PI4KII</i> construct)                  | GGG CGG CCG CTA GTC GAT TAC TTT ACT GAA TTC GAG GAC C  |
| <i>CG14671</i> For <i>Xba</i> I (to generate <i>CG14671</i> genomic rescue construct) | GCT CTA GAC CTA AAT AAT TGA AGA GAT AAC CAA ACG AC     |
| <i>CG14671</i> Rev <i>Not</i> I (to generate <i>CG14671</i> genomic rescue construct) | GGG CGG CCG CAA ACA GCT GAC GAG TAG AAT TCG CGG TAC    |

### Primers used to add a fluorescent tag to the *Tub84B* promoter expression vector

|                                                     |                                                        |
|-----------------------------------------------------|--------------------------------------------------------|
| mCherry For <i>Kpn</i> I (mCherry with start codon) | GGG GTA CCA ACA TGG TGA GCA AGG GCG AGG AGG AT         |
| mCherry Rev <i>Xba</i> I (mCherry with start codon) | GCT CTA GAC TTG TAC AGC TCG TCC ATG CCG CC             |
| mEGFP For <i>Kpn</i> I (mEGFP with start codon)     | GGG GTA CCA ACA TGG TGA GCA AGG GCG AGG AGC TGT TC     |
| mEGFP Rev <i>Xba</i> I (mEGFP with start codon)     | GCT CTA GAG AGT CCG GAC TTG TAC AGC TCG TCC ATG CCG AG |
| mEGFP For <i>Kpn</i> I (mEGFP with stop codon)      | GGG GTA CCA TGG TGA GCA AGG GCG AGG AGC TG             |
| mEGFP Rev <i>Xba</i> I (mEGFP with stop codon)      | GCT CTA GAT TAC TTG TAC AGC TCG TCC ATG CC             |

### Primers used to insert cDNAs into *Tub84B* promoter expression vector

|                                                                          |                                                |
|--------------------------------------------------------------------------|------------------------------------------------|
| AP-38/Garnet For <i>Xba</i> I (inserted 3' of mCherry)                   | GCT CTA GAA TGG CAC TGA AAA AAG TGA AGG G      |
| AP-38/Garnet Rev <i>Xba</i> I (inserted 3' of mCherry)                   | GCT CTA GAT TAC AAA ATC TCT TTG CTG GGC GTT GA |
| AP-38/Garnet For <i>Kpn</i> I (inserted 5' of GFP)                       | GGG GTA CCA ACA TGG CAC TGA AAA AAG TGA AGG G  |
| AP-38/Garnet Rev <i>Kpn</i> I (inserted 5' of GFP)                       | GGG GTA CCC AAA ATC TCT TTG CTG GGC GTT G      |
| <i>Vps29</i> For <i>Kpn</i> I (inserted 5' of GFP)                       | GGG GTA CCA ACA TGC TCG TTC TGG TAC TCG GCG    |
| <i>Vps29</i> Rev <i>Kpn</i> I (inserted 5' of GFP)                       | GGG GTA CCA TAG ATC TTC TTG TAC TCG ATG CG     |
| <i>Vps29</i> For <i>Xba</i> I (inserted 3' of mCherry)                   | GCT CTA GAA TGC TCG TTC TGG TAC TCG GCG        |
| <i>Vps29</i> Rev <i>Xba</i> I (inserted 3' of mCherry)                   | GCT CTA GAC TAG ATC TTC TTG TAC TCG ATG C      |
| PI4KII For <i>Xba</i> I (inserted 3' of mCherry or GFP)                  | GCT CTA GAA TGA GCG GCG CTC GGG ATC AGA CG     |
| PI4KII Rev <i>Xba</i> I (inserted 3' of mCherry or GFP)                  | GCT CTA GAT TAG CAC CAA GAG AAG AAA GGG CTC    |
| GFP-LERP For <i>Asp</i> 718 (inserted directly into $\alpha$ tub vector) | GCG GTA CCA TGG GAT GGA GCT GTA TCA            |
| GFP-LERP Rev <i>Xba</i> I (inserted directly into $\alpha$ tub vector)   | GCT CTA GAC TAA AGC AGC ATG TC                 |

### Primers used for site-directed mutagenesis of PI4KII

|                                       |                                               |
|---------------------------------------|-----------------------------------------------|
| PI4KII For ATP point mutation (K311M) | ATC AAT GCC TGG CCG TAT TTA TGC CAA AGG ACG A |
| PI4KII Rev ATP point mutation (K311M) | TCG TCC TTT GGC ATA AAT ACG GCC AGG CAT TGA T |
| PI4KII For CAT point mutation (D465A) | CAT ACG CAA CAC GGC CCG TGG CAA CGA CA        |
| PI4KII Rev CAT point mutation (D465A) | TGT CGT TGC CAC GGG CCG TGT TGC GTA TG        |

### Primers used for reverse transcriptase-coupled PCR to detect PI4KII transcripts

|                                                             |                                 |
|-------------------------------------------------------------|---------------------------------|
| PI4KII Exon 2 For (to detect somatic transcript)            | AGC AGA TAA CAG AAC CAA GCG AC  |
| PI4KII Exon 3 Rev (to detect somatic transcript)            | CGT CGT AAT GCA TGA CCA AGT TA  |
| PI4KII Unique Testes Exon For (to detect testes transcript) | CAA CAT TAA GTC GTT TCT CAG CCA |
| PI4KII Exon 4 Rev (to detect testes transcript)             | AAA GTA GGA ACC ACT GCT ACC CTG |

### Primers used to FLAG tag and subclone PI4KII (wild type and mutants) into pcDNA3.1

|                                |                                                         |
|--------------------------------|---------------------------------------------------------|
| 5' FLAG PI4KII <i>Hind</i> III | GGG AAG CTT ATG GAC TAC AAG GAC GAC GAT GAC AAG ATG AGC |
|                                | GGC GCT CGG GAT CA                                      |
| 3' PI4KII <i>Xba</i> I         | GCT CTA GAT TAG CAC CAA GAG AAG AAA GGG C               |

All sequences are shown 5' to 3'. Forward (For) and reverse (Rev) primers are indicated.
